# Supplementary material for: Comparing stability of carthamin and safflower yellow pigments at pH, temperature and light, from safflower (Carthamus tinctorius L.) florets.
Source: Oxford University Press journal article supplement (doi:10.1210/jc.2017-01658), 2009-01-01
Supplement: jc.2017-01658_supplemental_materials_1.docx [file jc.2017-01658_supplemental_materials_1.docx]

**Appendix A. Protocol: Transgender Male**

| **Year** | **Study** | **Participants** | **Age (years)** | **Medication** | **Duration of Treatment** |
| --- | --- | --- | --- | --- | --- |
| 2015 | Deutsch *et al. [1]* | 31 | 29 ± 6.9 | Testosterone cypionate 200 mg weekly IM | 6 months |
| 2015 | van Caenegem *et al. [2]* | 23 | 27 ± 9 | TU 1,000 mg/12 weeks IM | 12 months |
| 2014 | Pelusi *et al. [3]* | 45 | 27.9-33.9;26.6-32.1;25.6-30.9 | Testosterone enanthate 100 mg/10 days IM; testosterone gel 50 mg/day TTS; TU 1,000 mg/6-12 weeks IM | 12 months |
| 2014 | Wierckx *et al. [4]* | 53 | 27.3 ± 8.5 | TU 1,000 mg/6-12 weeks IM | 12 months |
| 2010 | Mueller *et al. [5]* | 45 | 30.4 ± 9.1 | TU 1,000 mg IM/12 weeks IM | 12 months |
| 2010 | Cupisti *et al. [6]* | 45 | 29.9 (CI 27.8-32.0) | TU 1,000 mg/12 weeks IM | 12 months |
| 2009 | Perrone *et al. [7]* | 27 |  | Testosterone enanthate 100 mg/10 days IM | 12 months |
| 2007 | Haraldsen *et al. [8]* | 21 | 25.1 ± 4.8 | Testosterone enantate 250 mg/3 weeks IM | 12 months |
| 2007 | Mueller *et al. [9]* | 35 | 29.6 ± 9.0 | TU 1,000 mg/3 months IM | 12 months |
| 2006 | Berra *et al. [10]* | 16 | 30.4 ± 5.4 | Testosterone enanthate 100 mg/10 days IM | 6 months |
| 2004 | Giltay *et al. [11]* | 81 | median 36.7 (range 21-61) | Sustanon 250mg/2 weeks (n = 61); TU 240 mg/day OR (n = 20) | 3-4 months |
| 2003 | Elbers *et al. [12]* | 17 | 23 ± 5 | Sustanon 250mg/2 weeks IM | 12 months |
| 1998 | Giltay *et al. [13]* | 15 | median 23 (range 16-33) | Sustanon 250mg/2 weeks IM | 12 months |
| 1997 | Elbers *et al. [14]* | 10 | 24 ± 6 | Sustanon 250mg/2 weeks IM | 12 months |
| 1997 | Elbers *et al. [15]* | 15 | 23 ± 5 | Sustanon 250mg/2 weeks IM | 12 months |

Abbreviations: TU, testosterone undecanoate; IM, intramuscular; TTS, transdermal; OR, oral

**Appendix A References:**

[1] Deutsch MB, Bhakri V, Kubicek K. Effects of Cross-Sex Hormone Treatment on Transgender Women and Men. Obstet Gynecol. 2015;125(3):605–10.

[2] Van Caenegem E, Wierckx K, Taes Y, Schreiner T, Vandewalle S, Toye K, et al. Body composition, bone turnover, and bone mass in trans men during testosterone treatment: 1-year follow-up data from a prospective case-controlled study (ENIGI). Eur J Endocrinol. 2015;172(2):163–71.

[3] Pelusi C, Costantino A, Martelli V, Lambertini M, Bazzocchi A, Ponti F, et al. Effects of three different testosterone formulations in female-to-male transsexual persons. J Sex Med. 2014;11(12):3002–11.

[4] Wierckx K, Van Caenegem E, Schreiner T, Haraldsen I, Fisher A, Toye K, et al. Cross-sex hormone therapy in trans persons is safe and effective at short-time follow-up: Results from the European network for the investigation of gender incongruence. J Sex Med. 2014;11(8):1999–2011.

[5] Mueller A, Haeberle L, Zollver H, Claassen T, Kronawitter D, Oppelt PG, et al. Effects of Intramuscular Testosterone Undecanoate on Body Composition and Bone Mineral Density in Female-to-Male Transsexuals. J Sex Med. 2010;7(9):3190–8.

[6] Cupisti S, Giltay EJ, Gooren LJ, Kronawitter D, Oppelt PG, Beckmann MW, et al. The impact of testosterone administration to female-to-male transsexuals on insulin resistance and lipid parameters compared with women with polycystic ovary syndrome. Fertil Steril. 2010;94(7):2647–53.

[7] Perrone AM, Cerpolini S, Maria Salfi NC, Ceccarelli C, De Giorgi LB, Formelli G, et al. Effect of long-term testosterone administration on the endometrium of female-to-male (FtM) transsexuals. J Sex Med. 2009;6(11):3193–200.

[8] Haraldsen IR, Haug E, Falch J, Egeland T, Opjordsmoen S. Cross-sex pattern of bone mineral density in early onset gender identity disorder. Horm Behav. 2007;52(3):334–43.

[9] Mueller A, Kiesewetter F, Binder H, Beckmann MW, Dittrich R. Long-term administration of testosterone undecanoate every 3 months for testosterone supplementation in female-to-male transsexuals. J Clin Endocrinol Metab. 2007;92(9):3470–5.

[10] Berra M, Armillotta F, D’emidio L, Costantino A, Martorana G, Pelusi G, et al. Testosterone decreases adiponectin levels in female to male transsexuals. Asian J Androl. 2006;8(6):725–9.

[11] Giltay EJ, Toorians AWFT, Sarabjitsingh AR, de Vries NA, Gooren LJG. Established risk factors for coronary heart disease are unrelated to androgen-induced baldness in female-to-male transsexuals. J Endocrinol. 2004;180(1):107–12.

[12] Elbers JMH, Giltay EJ, Teerlink T, Scheffer PG, Asscheman H, Seidell JC, et al. Effects of sex steroids on components of the insulin resistance syndrome in transsexual subjects. Clin Endocrinol (Oxf). 2003;58(5):562–71.

[13] Giltay EJ, Hoogeveen EK, Elbers JM, Gooren LJ, Asscheman H, Stehouwer CD, et al. Effects of sex steroids on plasma total homocysteine levels: A study in transsexual males and females. J Clin Endocrinol Metab. 1998;83(2):550–3.

[14] Elbers JMH, Asscheman H, Seidell JC, Megens JAJ, Gooren LJG. Long-term testosterone administration increases visceral fat in female to male transsexuals. J Clin Endocrinol Metab. 1997;82(7):2044–7.

[15] Elbers JMH, Asscheman H, Seidell JC, Frölich M, Meinders AE, Gooren LJG. Reversal of the sex difference in serum leptin levels upon cross-sex hormone administration in transsexuals. J Clin Endocrinol Metab. 1997;82(10):3267–70.

**Appendix B. Protocol: Transgender Female**

| **Year** | **Study** | **Participants** | **Age (years)** | **Medication** | **Duration of Treatment** |
| --- | --- | --- | --- | --- | --- |
| 2016 | Gava *et al. [1]* | 40 |  | CPA 50 mg/day or leuprolide acetate 3,75 mg/month IM + Estradiol 1-2 mg TTS | 12 months |
| 2015 | Deutsch *et al. [2]* | 16 | 29 ± 9.4 | Spironolactone 100 mg/day OR+ 17Estradiol 2 mg 2 dd OR (n=14) or 17-β Estradiol patch 100 mcg/day TTS (n= 1) or Estradiol valerate 20 mg/2 weeks IM (n= 1) | 6 months |
| 2014 | Wierckx *et al. [3]* | 53 | 31.7 ± 14.8 | CPA 50 mg/day OR + Estradiol valerate 4 mg/day OR (n = 40) or 17-β Estradiol patch 100 mcg/24 hours TTS (n = 13) | 12 months |
| 2011 | Mueller et al. [4] | 84 | 36.3 ± 11.3 | 3.8 mg goserelin acetate/4 weeks + Estradiol valerate 10 mg/10 days IM | 12 months |
| 2007 | Haraldsen *et al. [5]* | 12 | 29.3 ± 7.8 | 50 mcg Ethinylestradiol OR | 12 months |
| 2003 | Elbers *et al. [6]* | 20 | 26 ± 6 | 100 mg CPA**+ 100 mcg Ethinylestradiol OR | 12 months |
| 1999 | Elbers *et al. [7]* | 20 | 26 ± 6 | 100 mg CPA **+ 100 mcg Ethinylestradiol OR | 12 months |
| 1998 | Giltay *et al. [8]* | 18 | median 27 (range 18-37) | 100 mg CPA**+ 100 mcg Ethinylestradiol OR | 12 months |
| 1997 | Elbers *et al. [9]* | 17 | 26 ± 7 | 100 mg CPA**+ 100 mcg Ethinylestradiol OR | 12 months |

Abbreviations: CPA, cyproterone acetate; OR, oral; TTS, transdermal; IM, intramuscular; OR, oral

**Appendix B References:**

[1] Gava G, Cerpolini S, Martelli V, Battista G, Seracchioli R, Meriggiola MC. Cyproterone acetate versus leuprolide acetate in combination with transdermal oestradiol in transwomen: a comparison of safety and effectiveness. Clin Endocrinol (Oxf). 2016;n/a-n/a.

[2] Deutsch MB, Bhakri V, Kubicek K. Effects of Cross-Sex Hormone Treatment on Transgender Women and Men. Obstet Gynecol. 2015;125(3):605–10.

[3] Wierckx K, Van Caenegem E, Schreiner T, Haraldsen I, Fisher A, Toye K, et al. Cross-sex hormone therapy in trans persons is safe and effective at short-time follow-up: Results from the European network for the investigation of gender incongruence. J Sex Med. 2014;11(8):1999–2011.

[4] Mueller A, Haeberle L, Zollver H, Claassen T, Kronawitter D, Oppelt PG, et al. Effects of Intramuscular Testosterone Undecanoate on Body Composition and Bone Mineral Density in Female-to-Male Transsexuals. J Sex Med. 2010;7(9):3190–8.

[5] Haraldsen IR, Haug E, Falch J, Egeland T, Opjordsmoen S. Cross-sex pattern of bone mineral density in early onset gender identity disorder. Horm Behav. 2007;52(3):334–43.

[6] Elbers JMH, Giltay EJ, Teerlink T, Scheffer PG, Asscheman H, Seidell JC, et al. Effects of sex steroids on components of the insulin resistance Syndrome in transsexual subjects. Clin Endocrinol (Oxf). 2003;58(5):562–71.

[7] Elbers JMH, Asscheman H, Seidell JC, Gooren LJG. Effects of sex steroid hormones on regional fat depots as assessed by magnetic resonance imaging in transsexuals. Am J Physiol Metab. 1999;276(2):E317–25.

[8] Giltay EJ, Hoogeveen EK, Elbers JM, Gooren LJ, Asscheman H, Stehouwer CD, et al. Effects of sex steroids on plasma total homocysteine levels: A study in transsexual males and females. J Clin Endocrinol Metab. 1998;83(2):550–3.

[9] Elbers JMH, Asscheman H, Seidell JC, Frölich M, Meinders AE, Gooren LJG. Reversal of the sex difference in serum leptin levels upon cross-sex hormone administration in transsexuals. J Clin Endocrinol Metab. 1997;82(10):3267–70.
